# Supplementary material for: Associations of unconventional natural gas development with depression symptoms and disordered sleep in Pennsylvania
Source: PubMed Central journal article supplement (PMC6063969; doi:10.1038/s41598-018-29747-2), 2018-07-27

## **Supplemental Material for “Associations of unconventional natural gas development with depression symptoms and disordered sleep in Pennsylvania”**

Joan A. Casey, PhD<sup>1</sup>; Holly C. Wilcox, PhD<sup>2</sup>; Annemarie G. Hirsch, PhD<sup>3</sup>; Jonathan Pollak, MPP<sup>4</sup>; Brian S. Schwartz, MD, MS<sup>3,4,5</sup>

<sup>1</sup>Division of Environmental Health Sciences, University of California Berkeley School of Public Health, Berkeley, USA; <sup>2</sup>Department of Mental Health, Johns Hopkins University Bloomberg School of Public Health, Baltimore, Maryland, USA; <sup>3</sup>Department of Epidemiology and Health Services Research, Geisinger, Danville, Pennsylvania, USA; <sup>4</sup>Department of Environmental Health and Engineering, Johns Hopkins Bloomberg School of Public Health, Baltimore, Maryland, USA; <sup>5</sup>Department of Medicine, Johns Hopkins School of Medicine, Baltimore, Maryland, USA

### **Table of Contents:**

**Table S1.** ICD-9 codes used to identify disordered sleep.

**Table S2.** Calculation of sample weights.

**Table S3.** Association of UNGD and depression symptoms in survey multinomial logistic models using varying survey weights.

**Table S4.** Association between UNGD and disordered sleep in a weighted generalized estimating equations model, restricted to 2014-2015 diagnoses.

**Table S5.** Association between UNGD and disordered sleep (identified via a diagnostic code and sleep-related medication order) in a weighted generalized estimating equations model.

**Table S6.** Association of UNGD and depression symptoms in survey negative binomial models using varying survey weights.

**Table S7.** Association of UNGD and depression symptoms in survey multinomial logistic models: overall and among participants that answered all PHW-8 questions.

**Figure S1.** Flow diagram for identification of disordered sleep diagnoses.

**Table S1. ICD-9 codes used to identify disordered sleep.**

| <b>ICD-9 code</b> | <b>Description</b>                                              |
|-------------------|-----------------------------------------------------------------|
| 780.52            | Insomnia                                                        |
| 780.50            | Sleep disturbance, unspecified                                  |
| 307.47            | Other dysfunctions of sleep stages or arousal from sleep        |
| 780.59            | Other sleep disturbances                                        |
| 307.42            | Persistent disorder of initiating or maintaining sleep          |
| 780.5             | Sleep disturbances                                              |
| 307.41            | Transient disorder of initiating or maintaining sleep           |
| 307.40            | Nonorganic sleep disorder, unspecified                          |
| 307.48            | Repetitive intrusions of sleep                                  |
| 780.56            | Dysfunctions associated with sleep stages or arousal from sleep |
| 780.55            | Disruptions of 24-hour sleep-wake cycle                         |

Abbreviation: ICD-9 = *International Classification of Diseases, 9th Revision, Clinical Modification*

**Table S2. Calculation of sample weights.**

| <b>Race/ethnicity</b>         | <b>Higher likelihood of CRS</b> | <b>Intermediate likelihood of CRS</b> | <b>Lower likelihood of CRS</b> |
|-------------------------------|---------------------------------|---------------------------------------|--------------------------------|
| White non-Hispanic            |                                 |                                       |                                |
| Identified using EHR          | 13,132                          | 47,892                                | 131,366                        |
| Received baseline survey      | 12,209                          | 4,224                                 | 2,775                          |
| Responded to baseline survey  | 4,691                           | 1,481                                 | 871                            |
| Responded to follow-up survey | 3,076                           | 950                                   | 551                            |
| Sample weight                 | 4.27                            | 50.41                                 | 238.41                         |
| Black non-Hispanic            |                                 |                                       |                                |
| Identified using EHR          | 170                             | 991                                   | 2,832                          |
| Received baseline survey      | 159                             | 903                                   | 1,109                          |
| Responded to baseline survey  | 35                              | 144                                   | 155                            |
| Responded to follow-up survey | 17                              | 67                                    | 62                             |
| Sample weight                 | 10.00                           | 14.79                                 | 45.68                          |
| Hispanic                      |                                 |                                       |                                |
| Identified using EHR          | 192                             | 1,035                                 | 3,159                          |
| Received baseline survey      | 181                             | 966                                   | 1,174                          |
| Responded to baseline survey  | 35                              | 206                                   | 167                            |
| Responded to follow-up survey | 19                              | 92                                    | 98                             |
| Sample weight                 | 10.11                           | 11.25                                 | 32.23                          |

Abbreviations: CRS = chronic rhinosinusitis; EHR = electronic health record

**Table S3. Association between UNGD and disordered sleep in a weighted generalized estimating equations model, restricted to 2014-2015 diagnoses (n = 1,705<sup>a</sup>).**

| UNGD group <sup>b</sup> | Disordered sleep diagnosis <sup>c</sup> |
|-------------------------|-----------------------------------------|
|                         | OR (95% CI)                             |
| Very low                | 1.00                                    |
| Low                     | 1.23 (0.64 - 2.35)                      |
| Medium                  | 1.42 (0.74 - 2.73)                      |
| High                    | 1.28 (0.67 - 2.42)                      |

Abbreviations: CI = confidence interval; OR = odds ratio; UNGD = unconventional natural gas development

<sup>a</sup> Includes 775 cases and frequency-matched controls. Excludes follow-up responders outside of Pennsylvania (n = 34) and those that answered no depression symptom questions (n = 170).

<sup>b</sup> The UNGD metric was a composite for four phases of well development (pad preparation, drilling, stimulation, and production) and was assigned for the three months prior to each event.

<sup>c</sup> Models included truncated survey weights and adjusted for race/ethnicity (White non-Hispanic, Black non-Hispanic, Hispanic), sex (male, female), Medical Assistance (no, yes), age (years, linear and quadratic terms), smoking status (never, former, current), alcohol status (no; yes, not heavy; yes, heavy), body mass index (BMI, kg/m<sup>2</sup>, linear and quadratic terms), community socioeconomic deprivation (linear and quadratic terms), and water source (municipal water, well water).

**Table S4. Association between UNGD and disordered sleep (identified via a diagnostic code and sleep-related medication order) in a weighted generalized estimating equations model, (n = 2,006<sup>a</sup>).**

| UNGD group <sup>b</sup> | Disordered sleep diagnosis + medication |
|-------------------------|-----------------------------------------|
|                         | OR (95% CI)                             |
| Very low                | 1.00                                    |
| Low                     | 1.02 (0.89 – 1.17)                      |
| Medium                  | 1.14 (0.98 – 1.32)                      |
| High                    | 1.12 (0.94 – 1.33)                      |

Abbreviations: CI = confidence interval; OR = odds ratio; UNGD = unconventional natural gas development

<sup>a</sup> Includes 693 cases and frequency-matched controls. Excludes follow-up responders outside of Pennsylvania (n = 34) and those that answered no depression symptom questions (n = 170).

<sup>b</sup> The UNGD metric was a composite for four phases of well development (pad preparation, drilling, stimulation, and production) and was assigned for the three months prior to each event.

<sup>c</sup> Models included truncated survey weights and adjusted for race/ethnicity (White non-Hispanic, Black non-Hispanic, Hispanic), sex (male, female), Medical Assistance (no, yes), age (years, linear and quadratic terms), smoking status (never, former, current), alcohol status (no; yes, not heavy; yes, heavy), body mass index (BMI, kg/m<sup>2</sup>, linear and quadratic terms), community socioeconomic deprivation (linear and quadratic terms), and water source (municipal water, well water).

**Table S5. Association of UNGD and depression symptoms in survey multinomial logistic models using varying survey weights (n=4,762<sup>a</sup>).**

| UNGD group <sup>b</sup>               | Mild depression symptoms <sup>c,d</sup> | Moderate depression symptoms <sup>c,d</sup> | Moderately severe/severe depression symptoms <sup>c,d</sup> |
|---------------------------------------|-----------------------------------------|---------------------------------------------|-------------------------------------------------------------|
|                                       | OR (95% CI)                             | OR (95% CI)                                 | OR (95% CI)                                                 |
| Truncated survey weights <sup>e</sup> |                                         |                                             |                                                             |
| Very low                              | 1.00                                    | 1.00                                        | 1.00                                                        |
| Low                                   | 1.63 (1.21 - 2.19)                      | 1.22 (0.80 - 1.86)                          | 1.13 (0.61 - 2.06)                                          |
| Medium                                | 1.25 (0.92 - 1.71)                      | 1.04 (0.68 - 1.60)                          | 0.89 (0.47 - 1.69)                                          |
| High                                  | 1.51 (1.12 - 2.04)                      | 1.26 (0.83 - 1.92)                          | 1.39 (0.76 - 2.54)                                          |
| Full survey weights                   |                                         |                                             |                                                             |
| Very low                              | 1.00                                    | 1.00                                        | 1.00                                                        |
| Low                                   | 1.72 (1.14 - 2.59)                      | 1.20 (0.67 - 2.14)                          | 0.93 (0.37 - 2.34)                                          |
| Medium                                | 1.29 (0.84 - 1.98)                      | 1.23 (0.66 - 2.28)                          | 0.68 (0.26 - 1.79)                                          |
| High                                  | 1.95 (1.28 - 2.97)                      | 1.77 (0.98 - 3.20)                          | 1.47 (0.63 - 3.46)                                          |
| No survey weights                     |                                         |                                             |                                                             |
| Very low                              | 1.00                                    | 1.00                                        | 1.00                                                        |
| Low                                   | 1.23 (1.003 - 1.50)                     | 1.04 (0.78 - 1.39)                          | 1.19 (0.82 - 1.74)                                          |
| Medium                                | 0.996 (0.81 - 1.22)                     | 0.84 (0.63 - 1.13)                          | 0.91 (0.61 - 1.34)                                          |
| High                                  | 1.12 (0.92 - 1.37)                      | 1.06 (0.80 - 1.40)                          | 1.11 (0.76 - 1.61)                                          |

Abbreviations: CI = confidence interval; OR = odds ratio; UNGD = unconventional natural gas development

<sup>a</sup> Excludes follow-up responders outside of Pennsylvania (n = 34) and those who answered no depression symptom questions (n = 170).

<sup>b</sup> The UNGD metric was a composite for four phases of well development (pad preparation, drilling, stimulation, and production) and was assigned for the two weeks prior to follow-up survey return.

<sup>c</sup> Models adjusted for race/ethnicity (white non-Hispanic, black non-Hispanic, Hispanic), sex (male, female), Medical Assistance (no, yes), age (years, linear and quadratic terms), smoking status (never, former, current), alcohol status (no; yes, not heavy; yes, heavy), body mass index (BMI, kg/m, linear and quadratic terms), community socioeconomic deprivation (linear and quadratic terms), and water source (municipal water, well water).

<sup>d</sup> No depression symptoms was the base outcome.

<sup>e</sup> Primary analysis

**Table S6. Association of UNGD and depression symptoms in survey negative binomial models (n=4,762<sup>a</sup>) using varying survey weights.**

| UNGD group <sup>b</sup>               | Depression symptoms <sup>c</sup>                |
|---------------------------------------|-------------------------------------------------|
|                                       | Exponentiated coefficient <sup>d</sup> (95% CI) |
| Truncated survey weights <sup>e</sup> |                                                 |
| Very low                              | 1.00                                            |
| Low                                   | 1.14 (1.01 - 1.29)                              |
| Medium                                | 1.03 (0.91 - 1.17)                              |
| High                                  | 1.18 (1.04 - 1.34)                              |
| Full survey weights                   |                                                 |
| Very low                              | 1.00                                            |
| Low                                   | 1.12 (0.94 - 1.34)                              |
| Medium                                | 1.07 (0.88 - 1.29)                              |
| High                                  | 1.29 (1.08 - 1.56)                              |
| No survey weights                     |                                                 |
| Very low                              | 1.00                                            |
| Low                                   | 1.05 (0.96 - 1.15)                              |
| Medium                                | 0.96 (0.88 - 1.05)                              |
| High                                  | 1.03 (0.94 - 1.13)                              |

Abbreviations: CI = confidence interval; UNGD = unconventional natural gas development

<sup>a</sup> Excludes follow-up responders outside of Pennsylvania (n = 34) and those that answered no depression symptom questions (n = 170).

<sup>b</sup> The UNGD metric was a composite for four phases of well development (pad preparation, drilling, stimulation, and production) and was assigned for the two weeks prior to follow-up survey return.

<sup>c</sup> Models adjusted for race/ethnicity (White non-Hispanic, Black non-Hispanic, Hispanic), sex (male, female), Medical Assistance (no, yes), age (years, linear and quadratic terms), smoking status (never, former, current), alcohol status (no; yes, not heavy; yes, heavy), body mass index (BMI, kg/m, linear and quadratic terms), community socioeconomic deprivation (linear and quadratic terms), and water source (municipal water, well water).

<sup>d</sup> Ratio of mean symptom counts

<sup>e</sup> Primary analysis

**Table S7. Association of UNGD and depression symptoms in survey multinomial logistic models: overall (n = 4,762<sup>a</sup>) and among participants that answered all PHW-8 questions**

| UNGD group <sup>b</sup>                     | Mild depression symptoms <sup>c,d</sup> | Moderate depression symptoms <sup>c,d</sup> | Moderately severe/severe depression symptoms <sup>c,d</sup> |
|---------------------------------------------|-----------------------------------------|---------------------------------------------|-------------------------------------------------------------|
|                                             | OR (95% CI)                             | OR (95% CI)                                 | OR (95% CI)                                                 |
| <b>Overall (n = 4,762<sup>a</sup>)</b>      |                                         |                                             |                                                             |
| Very low                                    | 1.00                                    | 1.00                                        | 1.00                                                        |
| Low                                         | 1.63 (1.21 - 2.19)                      | 1.22 (0.80 - 1.86)                          | 1.13 (0.61 - 2.06)                                          |
| Medium                                      | 1.25 (0.92 - 1.71)                      | 1.04 (0.68 - 1.60)                          | 0.89 (0.47 - 1.69)                                          |
| High                                        | 1.51 (1.12 - 2.04)                      | 1.26 (0.83 - 1.92)                          | 1.39 (0.76 - 2.54)                                          |
| <b>Answered all 8 questions (n = 4,419)</b> |                                         |                                             |                                                             |
| Very low                                    | 1.00                                    | 1.00                                        | 1.00                                                        |
| Low                                         | 1.65 (1.21 - 2.22)                      | 1.06 (0.68 - 1.64)                          | 1.27 (0.69 - 2.36)                                          |
| Medium                                      | 1.33 (0.96 - 1.84)                      | 0.95 (0.61 - 1.50)                          | 0.83 (0.42 - 1.65)                                          |
| High                                        | 1.61 (1.12 - 2.24)                      | 1.24 (0.79 - 1.94)                          | 1.34 (0.70 - 2.58)                                          |

Abbreviations: CI = confidence interval; OR = odds ratio; PHQ-8 = Patient Health Questionnaire-8; UNGD = unconventional natural gas development

<sup>a</sup> Excludes the follow-up responders outside of Pennsylvania (n = 34) and those who answered no depression symptom questions (n = 170).

<sup>b</sup> The UNGD metric was a composite for four phases of well development (pad preparation, drilling, stimulation, and production) and was assigned for the two weeks prior to follow-up survey return.

<sup>c</sup> Models used truncated survey weights and adjusted for race/ethnicity (White non-Hispanic, Black non-Hispanic, Hispanic), sex (male, female), Medical Assistance (no, yes), age (years, linear and quadratic terms), smoking status (never, former, current), alcohol status (no; yes, not heavy; yes, heavy), body mass index (BMI, kg/m<sup>2</sup>, linear and quadratic terms), community socioeconomic deprivation (linear and quadratic terms), and water source (municipal water, well water).

<sup>d</sup> No depression symptoms was the base outcome.



**Figure S1. Flow diagram for identification of disordered sleep diagnoses.** Disordered sleep events were identified using medications and *ICD-9* codes from encounters (98% outpatient). In this figure, the numbers refer to counts of medications for disordered sleep and encounters with *ICD-9* codes for disordered sleep. Abbreviation: *ICD-9* = *International Classification of Diseases, 9th Revision, Clinical Modification*

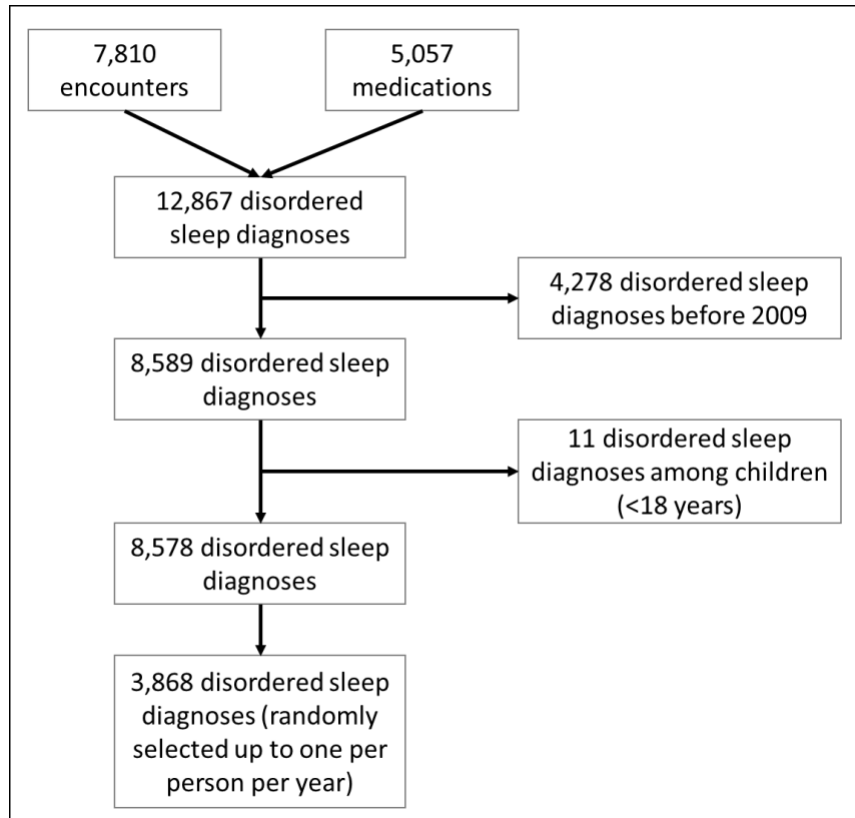

Supplement: 41598_2018_29747_MOESM1_ESM.pdf [file 41598_2018_29747_MOESM1_ESM.pdf]
